# Supplementary material for: Energetic interpenetrating polymer network based on orthogonal azido–alkyne click and polyurethane for potential solid propellant
Source: Royal Society of Chemistry journal article supplement (doi:10.1039/c5ra10467j), 2015-01-01
Supplement: c5ra10467j1.pdf [file c5ra10467j1.pdf]

## SUPPORTING INFORMATION

### Energetic Interpenetrating Polymer Network Based on Orthogonal Azido-Alkyne Click and Polyurethane for Potential Solid Propellant

Abbas Tanver,<sup>a</sup> Mu-Hua Huang,<sup>\*a</sup> Yunjun Luo,<sup>\*a</sup> Syed Khalid<sup>a</sup> and Tariq Hussain<sup>b</sup>

<sup>a</sup> School of Materials Science and Engineering, Beijing Institute of Technology, Beijing, 100081, China

<sup>b</sup> School of Mechatronics Engineering, Beijing Institute of Technology, Beijing, 100081, China

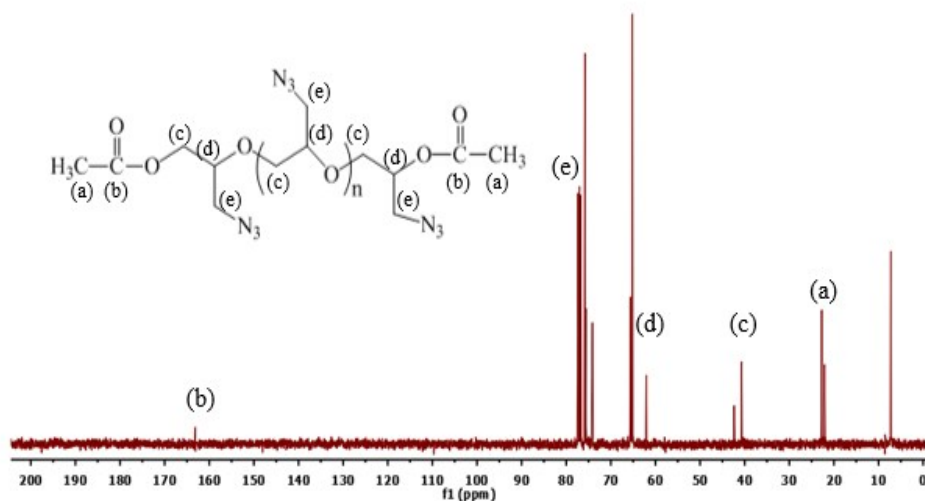

Figure S1: <sup>13</sup>C NMR of the Acyl-GAP

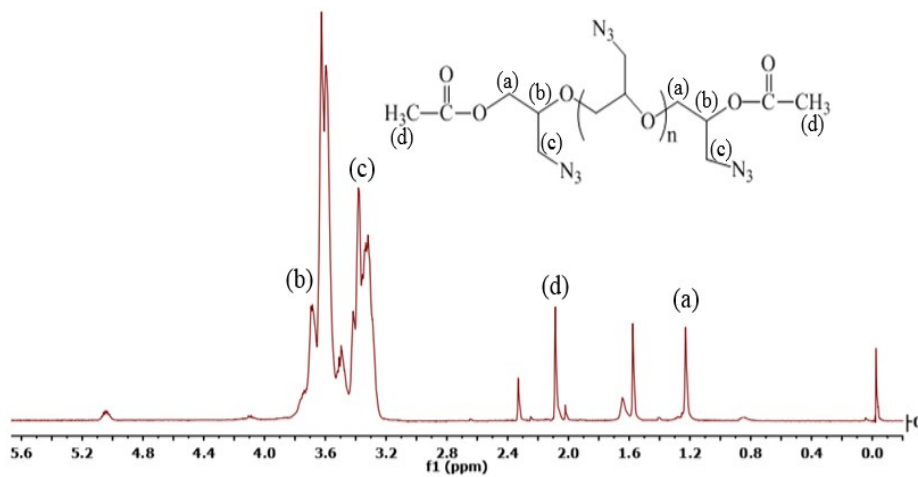

Figure S2: <sup>1</sup>H NMR of the Acyl-GAP

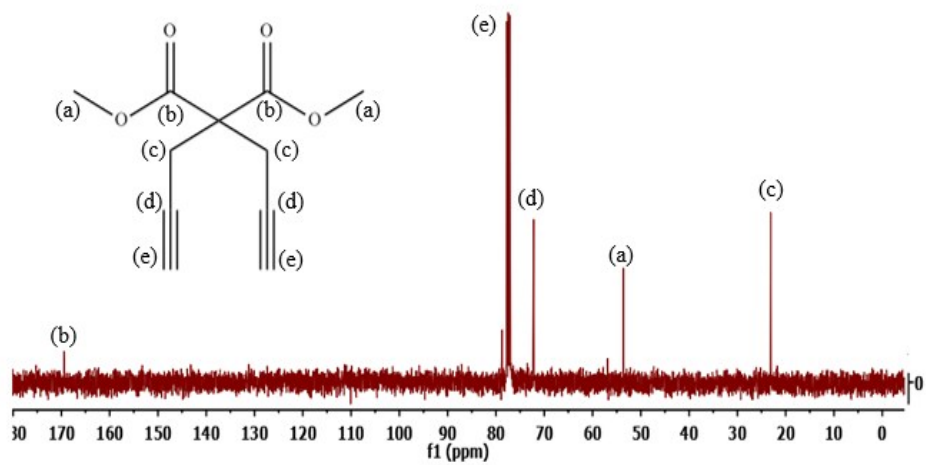

**Figure S3:** <sup>13</sup>C NMR of the DDPM

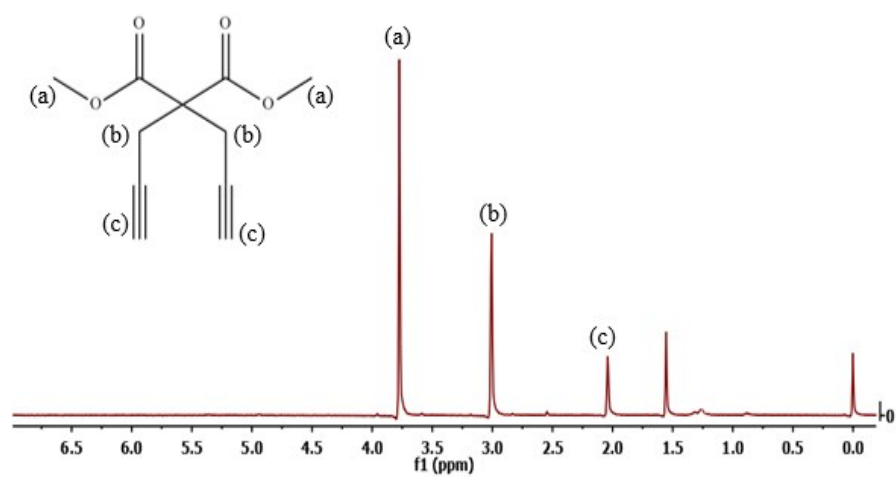

**Figure S4:** <sup>1</sup>H NMR of the DDPM

**Table S1:** GPC data of the GAP and Acyl-GAP

| Sample   | Mn (g/mol) | Mw (g/mol) | PDI (Mw/Mn) |
|----------|------------|------------|-------------|
| GAP      | 4783       | 7193       | 1.504       |
| Acyl-GAP | 4825       | 7331       | 1.5193      |

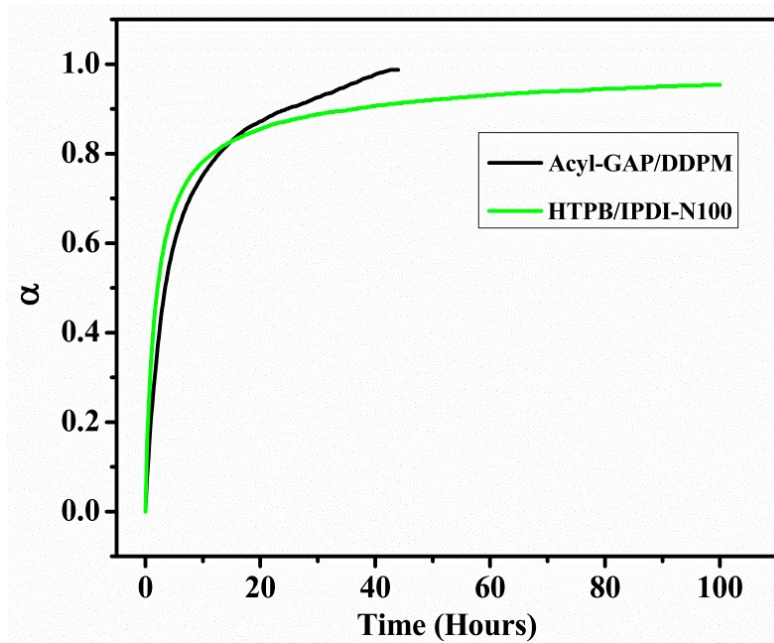

Figure S5: Conversion curves time for Acyl- GAP/DDPM and HTPB/IPDI-N100 at 60 °C

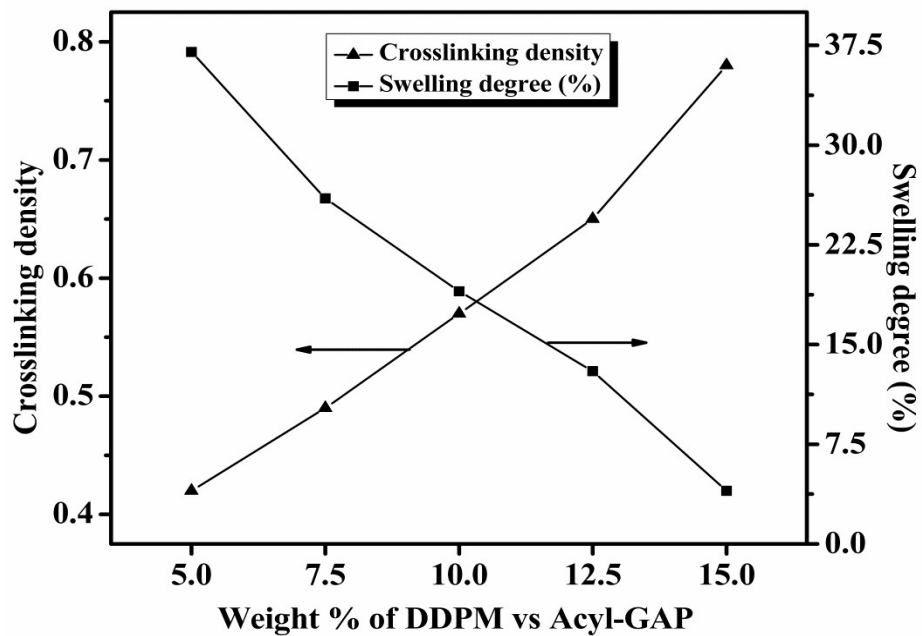

Figure S6: Effect of weight % of DDPM to Acyl- GAP on swelling degree and cross-linking density

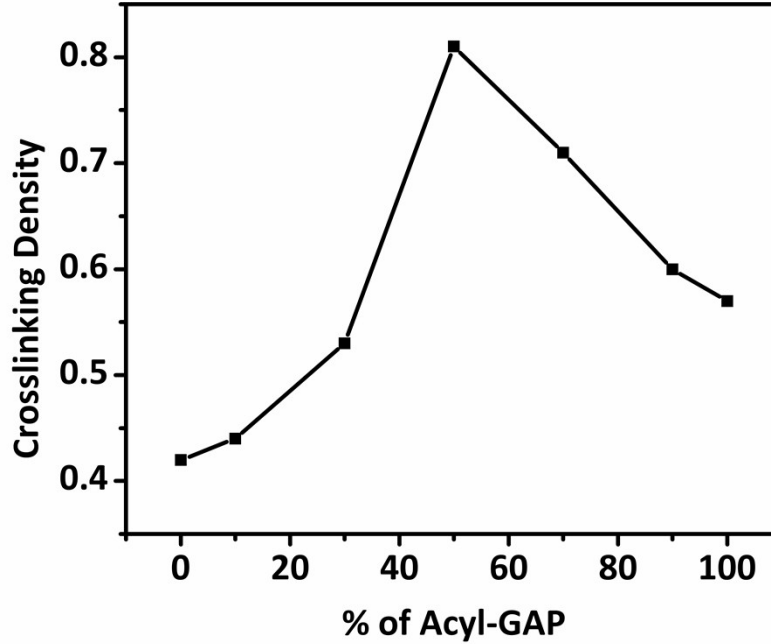

**Figure S7:** Effect of weight ratio of % Acyl-GAP vs HTPB on the cross-linking density

**Table S2:** DSC thermo grams data

| Sample Code  | Onset (°C) | Offset (°C) | Midpoint ( $T_g$ ) (°C) |
|--------------|------------|-------------|-------------------------|
| PU           | -80.9      | -73.53      | -77.5                   |
| 10% Acyl-GAP | -80.8      | -72.5       | -76.8                   |
| 30% Acyl-GAP | -76.2      | -69.1       | -72.5                   |
| 50% Acyl-GAP | -79.1      | -72.0       | -75.3                   |
|              | -43.3      | -28.1       | -36.9                   |
| 70% Acyl-GAP | -43.4      | -29.5       | -36.8                   |
| 90% Acyl-GAP | -42.5      | -28.8       | -35.1                   |
| Triazole     | -41.8      | -28.1       | -34.5                   |

**Table S3:** Peak decomposition temperatures data of Acyl-GAP, single and IPN's

| Sample Code   | Onset exothermic decomposition temperature ( $T_{i}$ , °C) |           | Peak decomposition temperature ( $T_{d}$ , °C) |           | Endothermic peak decomposition temperature ( $T_{epd}$ , °C) |
|---------------|------------------------------------------------------------|-----------|------------------------------------------------|-----------|--------------------------------------------------------------|
|               | $T_{1od}$                                                  | $T_{2od}$ | $T_{1pd}$                                      | $T_{2pd}$ |                                                              |
| Acyl-GAP      | 213                                                        |           | 250                                            |           |                                                              |
| PU            | 298                                                        |           | 365                                            |           | 458                                                          |
| 10 % Acyl-GAP | 213                                                        | 277       | 248                                            | 364       | 458                                                          |
| 30 % Acyl-GAP | 210                                                        | 279       | 253                                            | 366       | 461                                                          |
| 50 % Acyl-GAP | 208                                                        | 277       | 252                                            | 368       | 462                                                          |
| 70 % Acyl-GAP | 210                                                        | 280       | 251                                            | 366       | 459                                                          |
| 90 % Acyl-GAP | 211                                                        | 275       | 248                                            | 365       | 458                                                          |
| Triazole      | 209                                                        |           | 248                                            |           |                                                              |

$T_{1od}$ , first onset exothermic decomposition temperature;  $T_{1pd}$ , first peak exothermic decomposition temperature;  $T_{2od}$ , second onset exothermic decomposition temperature;  $T_{2pd}$ , second peak exothermic decomposition temperature;  $T_{epd}$ , °C, endothermic peak decomposition temperature

**Table S4:** Impact, friction and ESD sensitivity data

| Sample Code   | Impact sensitivity (Joules) | Friction sensitivity (Newton) | Electrostatic discharge sensitivity ESD (Joules) |
|---------------|-----------------------------|-------------------------------|--------------------------------------------------|
| Acyl-GAP      | > 40 J                      | > 360 N                       | No ignition at 4.5 Joules                        |
| PU            | > 40 J                      | > 360 N                       | No ignition at 4.5 Joules                        |
| 10 % Acyl-GAP | > 40 J                      | > 360 N                       | No ignition at 4.5 Joules                        |
| 30 % Acyl-GAP | > 40 J                      | > 360 N                       | No ignition at 4.5 Joules                        |
| 50 % Acyl-GAP | > 40 J                      | > 360 N                       | No ignition at 4.5 Joules                        |
| 70 % Acyl-GAP | > 40 J                      | > 360 N                       | No ignition at 4.5 Joules                        |
| 90 % Acyl-GAP | > 40 J                      | > 360 N                       | No ignition at 4.5 Joules                        |
| Triazole      | > 40 J                      | > 360 N                       | No ignition at 4.5 Joules                        |

**Impact Sensitivity:** Insensitive > 40 J, less sensitive  $\geq$  35 J, sensitive  $\geq$  4 J, very sensitive  $\leq$  3J  
**Friction Sensitivity:** Insensitive > 360 N, less sensitive = 360 N, sensitive < 360 N to > 80 N, very sensitive  $\leq$  80 N, extreme sensitive  $\leq$  10 N.

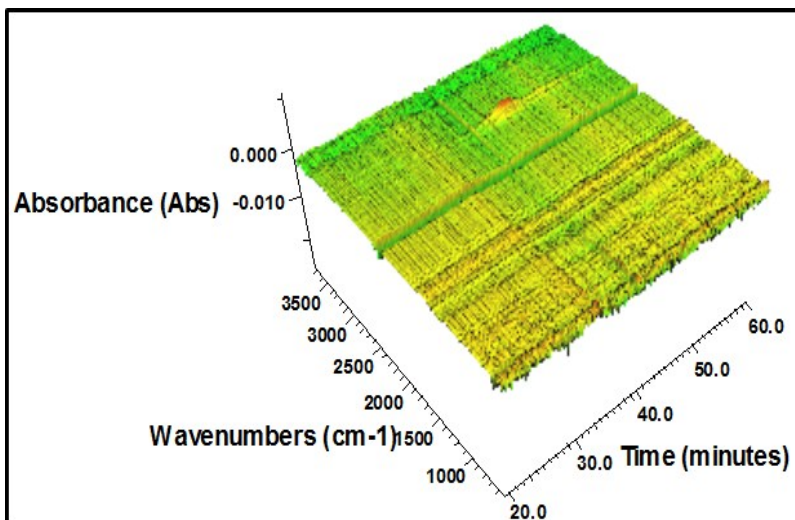

**Figure S8** Three-dimensional TGA-FTIR of the decomposition products of 50:50 % Acyl-GAP/HTPB

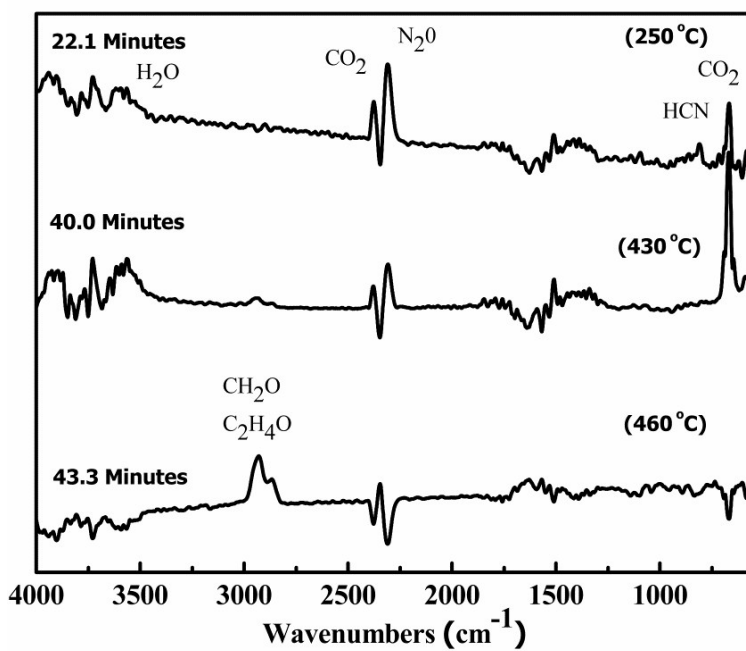

**Figure S9:** FTIR spectra of gas products during decomposition of 50:50 % Acyl-GAP/HTPB
